# Supplementary material for: Improving the Enzymatic Activity and Stability of a Lytic Polysaccharide Monooxygenase
Source: MDPI journal article supplement (doi:10.3390/ijms24108963), 2023-05-18
Supplement: s1 [file s1]

# **Improving the Enzymatic Activity and Stability of a Lytic Polysaccharide Monooxygenase**

Miesho Hadush Berhe<sup>1,2,3,4,⊥</sup> Xiangfei Song,<sup>1,2,</sup> and Lishan Yao<sup>1,2,\*</sup>

<sup>1</sup>Qingdao New Energy Shandong Laboratory, Qingdao Institute of Bioenergy and Bioprocess Technology, Chinese Academy of Sciences, Qingdao, 266101, China

<sup>2</sup>Shandong Energy Institute, Qingdao, 266101, China

<sup>3</sup>University of Chinese Academy of Sciences, Beijing, 100049, China

<sup>4</sup>Department of Biotechnology, College of Natural and Computational Sciences, Aksum University, 1010, Axum, Ethiopia

## Supporting Information

**Table S1. Primers used for mutagenesis**

| Mutants | Sequences (5'--3')               |
|---------|----------------------------------|
| Y3F-F   | TTTATTAAAGAGCCGGTAAGCAGAGC       |
| Y3F-R   | TCCGTGACCTCCTATTTGTT CG          |
| I4V-F   | TATG TTAAAGAGCCGGTAAGCAGAGCAT    |
| I4V-R   | TCCGTGACCTCCTATTTGTT CG          |
| K5E-F   | TATATTGAAGAGCCGGTAAGCAGAGCATATAT |
| K5E-R   | TCCGTGACCTCCTATTTGTT CG          |
| N36A-F  | GCA CTGAAAGTCAGC GACGGCAG        |
| N36A-R  | GATGTGGGT TCGGGTTTAA CTTCT       |
| N36E-F  | GAA CCGCA GAGCGTTGAAGGTC         |
| N36E-R  | ATCAATTACT GAACCGTATT TTTGGGCT   |
| V40E-F  | GAA GACGGCAGCAGCGAAATCT          |
| V40E-R  | ACTTTCAGG TTGATGTGGG TTTC        |
| V40A-F  | GCT GAAGGTCCGAAAGGTTTCCC         |
| V40A-R  | GCTCTGCGGG TTATCAATTA CTG        |
| V40I-F  | ATC GAAGGTCCGAAAGGTTTCCC         |
| V40I-R  | GCTCTGCGGG TTATCAATTA CTG        |
| V40L-F  | CTG GAAGGTCCGAAAGGTTTCCC         |
| V40L-R  | GCTCTGCGGG TTATCAATTA CTG        |
| V40M-F  | ATG GAAGGTCCGAAAGGTTTCCC         |
| V40M-R  | GCTCTGCGGG TTATCAATTA CTG        |
| R55Q-F  | CAG ATAGCA AGCGCAAATGGTG GTAG    |
| R55Q-R  | ACCATCCGGG GGACCTG               |
| N60G-F  | GGT GGTGGTAGCGGTCAGATTGA         |
| N60G-R  | TGCGCTTGCTATACGACCAT C           |
| H77R-F  | CGT TGGGTAAACAGAATATCAGAGG       |
| H77R-R  | GTCTGCTGTCTGTTTATCTA AG          |
| E124D-F | GAT CTGATTGGCACCGTTAATCATG       |
| E124D-R | AAATTCGTCA CGGCTCAGCG            |
| G158A-F | GCA GTTTGGGATGTTGCAGATACC        |
| G158A-R | CAGAATGATG TGATAGCCGCT           |

**Table S2.** Apparent kinetic parameters of the purified enzymes

| Purified enzymes | $k_{cat}$ (min <sup>-1</sup> ) | $K_m$ (mM)   |
|------------------|--------------------------------|--------------|
| V40L-E124D       | 5.15 ± 0.07                    | 33.53 ± 1.6  |
| I4V-E124D        | 4.74 ± 0.25                    | 95.46 ± 9.5  |
| V40L-Y3F         | 3.98 ± 0.05                    | 30.85 ± 1.29 |
| V40L-I4V         | 4.09 ± 0.27                    | 53.45 ± 9.23 |
| E124D-Y3F        | 5.02 ± 0.31                    | 93.29 ± 9.16 |
| V40L             | 5.18 ± 0.12                    | 32.55 ± 3.6  |
| I4V              | 3.92 ± 0.28                    | 71.31 ± 7.8  |
| E124D            | 3.76 ± 0.03                    | 13.73 ± 0.82 |
| Y3F              | 3.24 ± 0.08                    | 38.33 ± 3.12 |
| V40M             | 3.75 ± 0.05                    | 27.69 ± 1.49 |
| K5E              | 3.19 ± 0.08                    | 15.59 ± 1.78 |
| V40I             | 3.18 ± 0.14                    | 25.36 ± 3.84 |
| V40A             | 2.40 ± 0.09                    | 51.46 ± 5.34 |
| R55Q             | 2.48 ± 0.01                    | 13.09 ± 0.41 |
| N36E             | 2.55 ± 0.06                    | 29.02 ± 2.43 |
| WT               | 2.50 ± 0.27                    | 41.33 ± 7.33 |

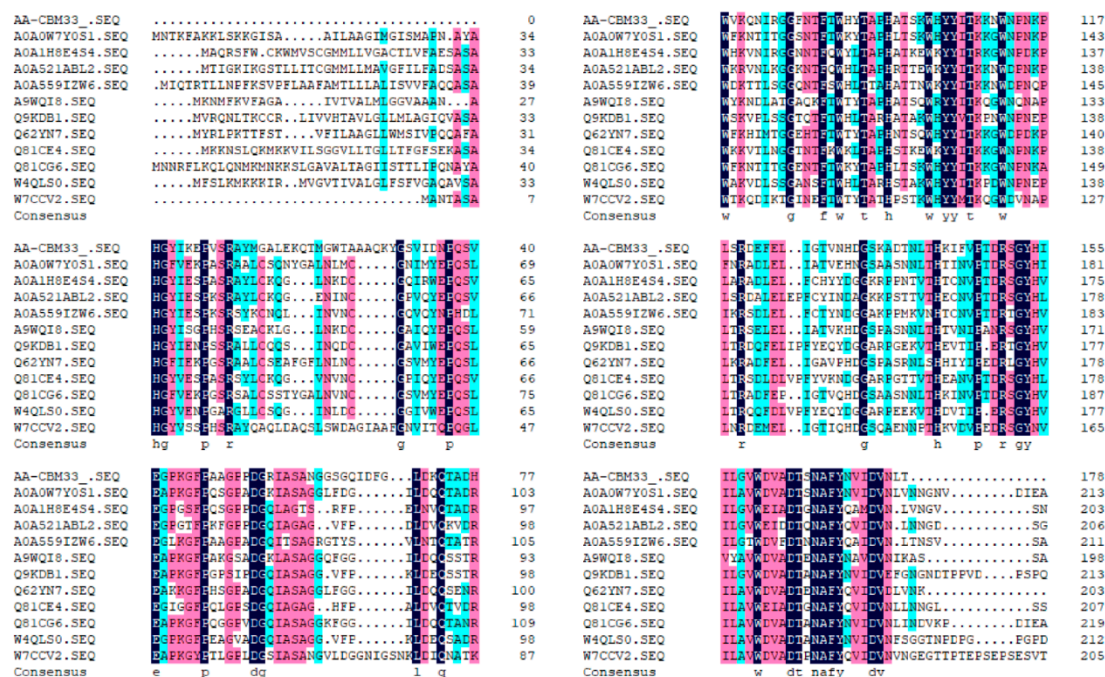

**Figure S1.** Sequences alignment of *BaLPMO10A* (AA-CBM33) and its homologs. The multiple amino acid sequence alignment was generated using the DNAMAN software.

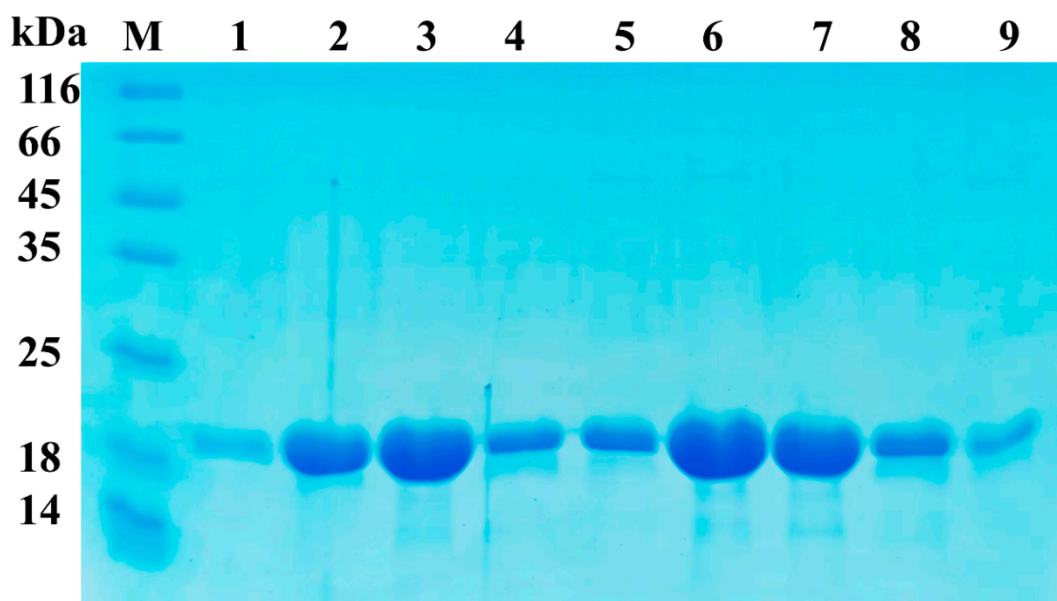

**Figure S2.** SDS-PAGE of the purified proteins; (M: standard protein marker), the lanes 1, 2, 3, 4, 5, 6, 7, 8, and 9 represent H77R, WT, V40L, N36E, V40I, I4V, E124D, Y3F, and V40M respectively. The remaining mutants have a similar purity. But they were not run on the same SDS-PAGE and thus are not shown.

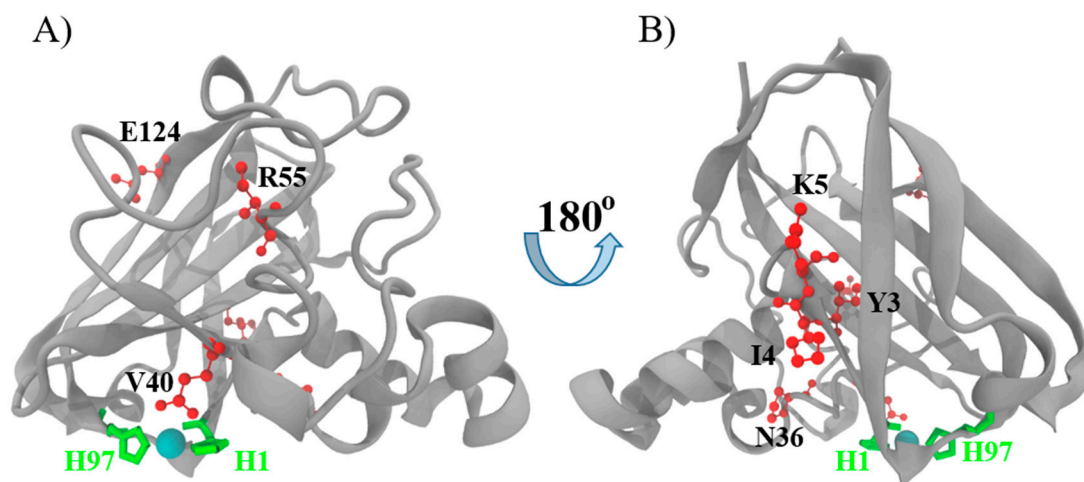

**Figure S3.** Structural representation of *BaLPMO10A* (PDB 2YOX), The active site is close to H1, showing copper active site (side chains colored green) and higher activity mutation site (side chains colored red). The distances from the higher activity mutation site's C $\alpha$  V40, I4, Y3, E124, K5, R55 and N36 to copper ions is 8.0 Å, 15.9 Å, 13.8 Å, 24.2 Å, 19.1 Å, 17.8 Å and 11.5 Å respectively.

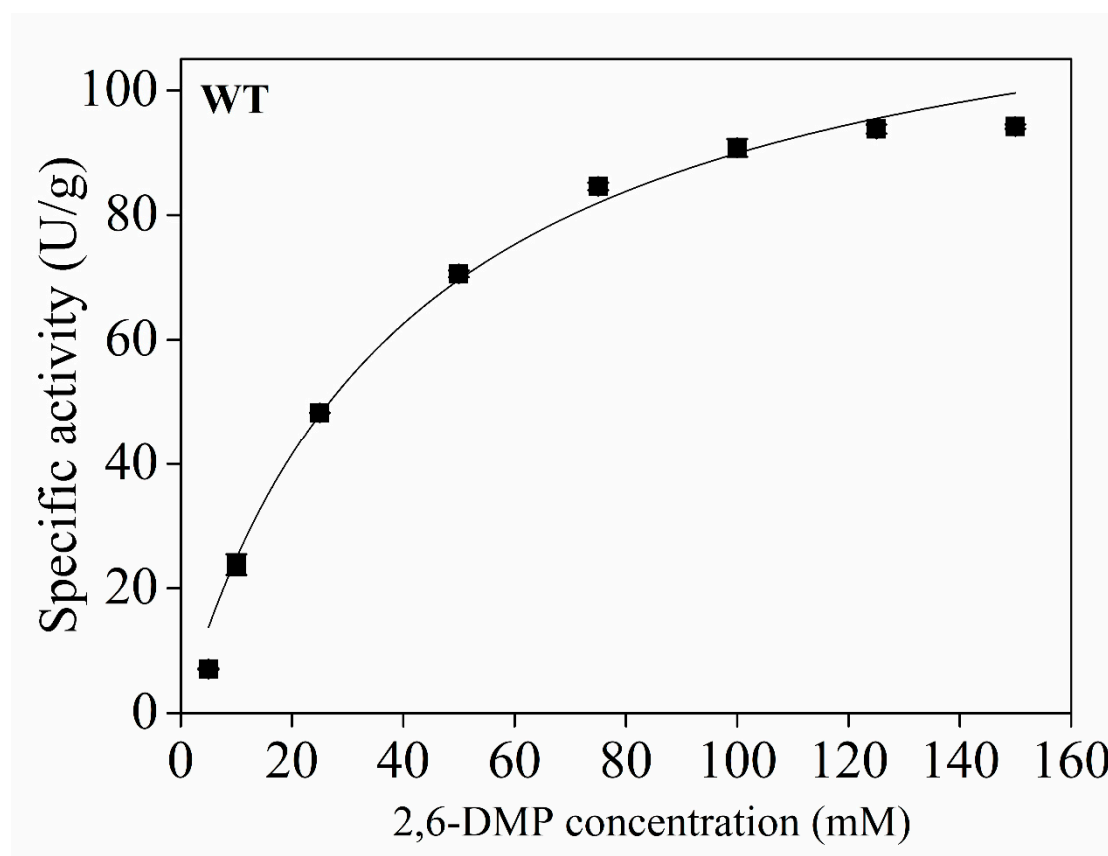

**Figure S4:** Apparent kinetic parameters of the purified enzyme wild type (WT). It is generated and analyzed by fitting using the OriginPro software.
